# Supplementary material for: Alleviation of Surgery-Induced Osteitis in Sinonasal Cavity by Dexamethasone-Loaded Poly(lactic-co-glycolic acid) (PLGA) Microparticles with Strong Calcium-Binding Affinity
Source: MDPI journal article supplement (doi:10.3390/pharmaceutics14030546), 2022-02-28
Supplement: s1 [file s1]

# Supplementary Materials: Alleviation of Surgery-Induced Osteitis in Sinonasal Cavity by Dexamethasone-Loaded Poly(lactic-co-glycolic acid) (PLGA) Microparticles with Strong Calcium-Binding Affinity

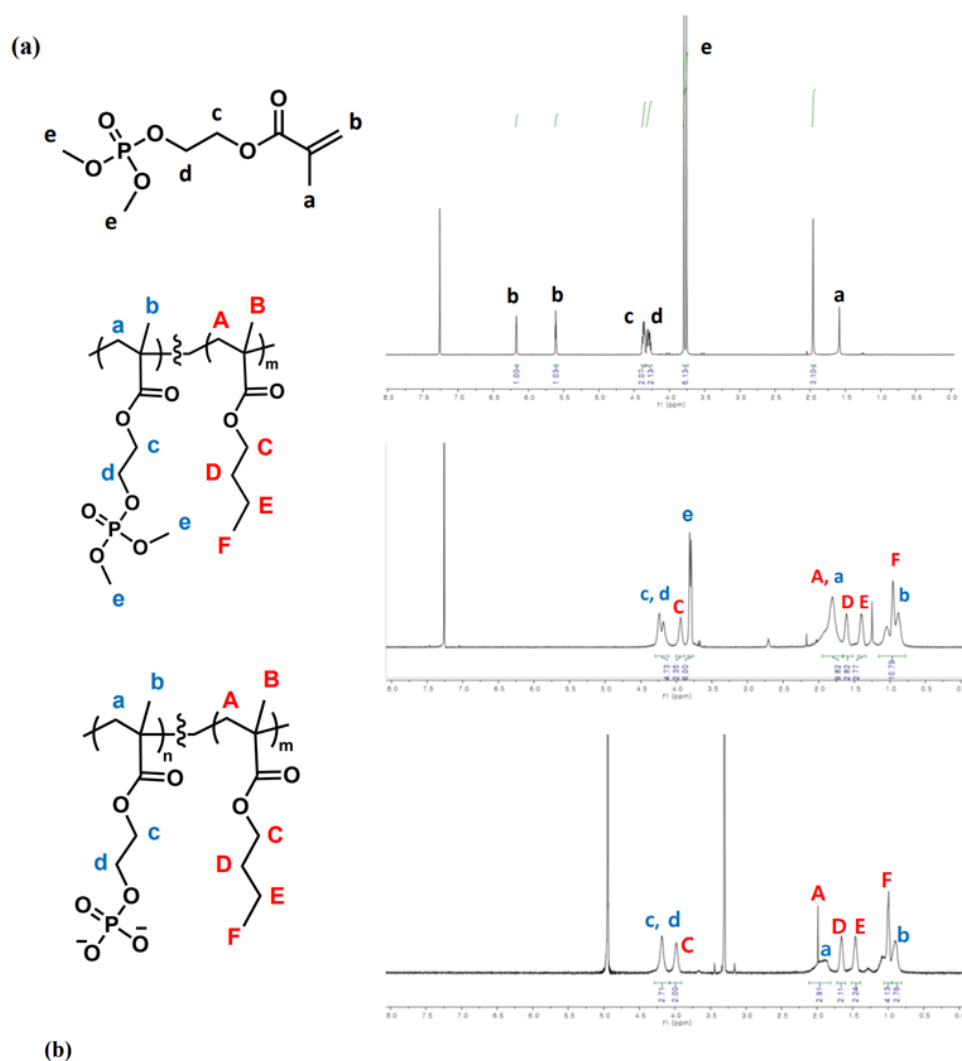

<sup>a</sup> Determined by  $^1\text{H}$  NMR.

<sup>b</sup> Determined by GPC using PEG standards.

**Figure S1.** Synthesis of poly(butyl methacrylate-co-methacryloyloxyethyl phosphate) (PBMP). (a)  $^1\text{H}$ -NMR spectra of DMOEP in  $\text{CDCl}_3$ , poly(BMA-co-DMOEP) in  $\text{CDCl}_3$ , and PBMP in  $\text{CD}_3\text{OD}$ , respectively. (b) The composition and molecular weight information of PBMP.

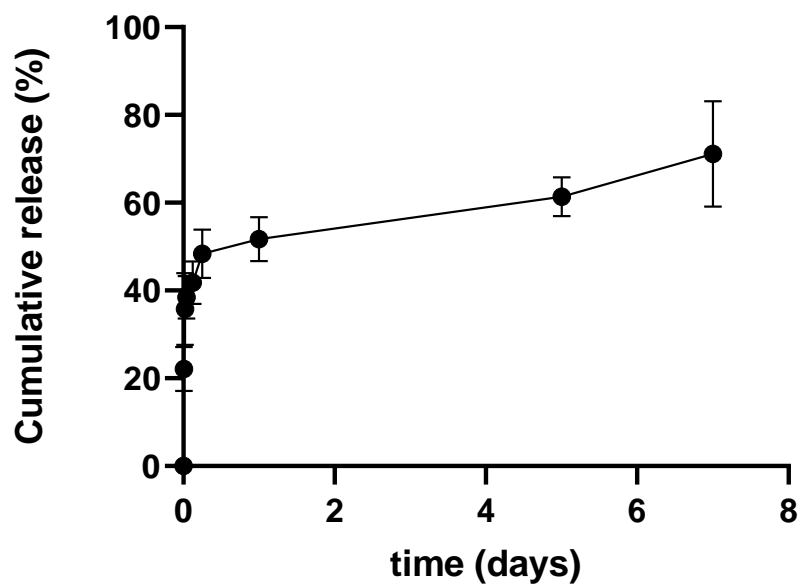

**Figure S2.** *In vitro* release profile of Dex-PLGA/PBMP microparticles in PBS medium at 37 °C. Each data point represents average  $\pm$  S.D. (n = 5).
